# Supplementary material
Source: Springer Nature journal article supplement (https://www.springermedizin.de/resource/supplementary/12903_2013_343_MOESM1_ESM.pdf/9516954)
Supplement: MOESM1 [file 9516954]

## Tables

Table 1 - Demographic and risk related characteristics among 205 HIV+/HIV- men attending an STI clinic in PR

| Characteristic                  | Number of<br>Subjects | Frequency (%) |
|---------------------------------|-----------------------|---------------|
| <b><u>Demographics</u></b>      |                       |               |
| <b>Age at recruitment</b>       |                       |               |
| Mean (SD)                       | 38.5 (14.2)           |               |
| 16-24                           | 44                    | 21.9          |
| 25-34                           | 41                    | 20.4          |
| 35-44                           | 41                    | 20.4          |
| 45-54                           | 46                    | 22.9          |
| 55+                             | 29                    | 14.4          |
| <b>Level of education</b>       |                       |               |
| < High School                   | 54                    | 26.5          |
| High School                     | 79                    | 38.7          |
| > High School                   | 71                    | 34.8          |
| <b>Employed</b>                 |                       |               |
| No                              | 43                    | 21.1          |
| Yes                             | 110                   | 53.9          |
| <b>Type of Health Insurance</b> |                       |               |
| None                            | 37                    | 18.3          |
| Public                          | 119                   | 58.9          |
| Private                         | 46                    | 22.8          |

| <b>Characteristic</b>                                  | <b>Number of<br/>Subjects</b> | <b>Frequency (%)</b> |
|--------------------------------------------------------|-------------------------------|----------------------|
| <b><u>Behavioral</u></b>                               |                               |                      |
| <b>Lifetime Smoking</b>                                |                               |                      |
| No                                                     | 54                            | 26.5                 |
| Yes                                                    | 150                           | 73.5                 |
| <b>Current smoker</b>                                  |                               |                      |
| No                                                     | 41                            | 34.2                 |
| Yes                                                    | 79                            | 65.8                 |
| <b>Years Smoking</b>                                   |                               |                      |
| Mean (SD)                                              | 23.9 (14.3)                   |                      |
| <b>Ever had an alcoholic beverage</b>                  |                               |                      |
| No                                                     | 10                            | 4.9                  |
| Yes                                                    | 194                           | 95.1                 |
| <b>Ever smoked marihuana</b>                           |                               |                      |
| No                                                     | 77                            | 37.7                 |
| Yes                                                    | 127                           | 62.3                 |
| <b>Ever smoked marihuana in the past 12<br/>months</b> |                               |                      |
| No                                                     | 69                            | 55.2                 |
| Yes                                                    | 56                            | 44.8                 |

| <b>Characteristic</b>                                               | <b>Number of<br/>Subjects</b> | <b>Frequency (%)</b> |
|---------------------------------------------------------------------|-------------------------------|----------------------|
| <b><u>Sexual Activity</u></b>                                       |                               |                      |
| <b>MSM</b>                                                          |                               |                      |
| No                                                                  | 136                           | 70.5                 |
| Yes                                                                 | 57                            | 29.5                 |
| <b>MSM who had oral sex at least once in<br/>their lifetime</b>     |                               |                      |
| No                                                                  | 5                             | 8.8                  |
| Yes                                                                 | 52                            | 91.2                 |
| <b>MSM who had oral sex at least once in the<br/>past 12 months</b> |                               |                      |
| No                                                                  | 3                             | 8.3                  |
| Yes                                                                 | 33                            | 91.7                 |
| <b>MSW</b>                                                          |                               |                      |
| No                                                                  | 30                            | 15.8                 |
| Yes                                                                 | 160                           | 84.2                 |
| <b>MSW who had oral sex at least once in<br/>their lifetime</b>     |                               |                      |
| No                                                                  | 13                            | 8.1                  |
| Yes                                                                 | 147                           | 91.9                 |

**MSW who had oral sex at least once in the  
past 12 months**

|     |    |      |
|-----|----|------|
| No  | 29 | 24.0 |
| Yes | 92 | 76.0 |

---

| <b>Characteristic</b> | <b>Number of<br/>Subjects</b> | <b>Frequency (%)</b> |
|-----------------------|-------------------------------|----------------------|
|-----------------------|-------------------------------|----------------------|

---

**HIV and HPV related**

**HIV Status**

|     |     |      |
|-----|-----|------|
| No  | 101 | 49.3 |
| Yes | 103 | 50.2 |

**Years living with HIV**

Mean (SD) 11.5 (8.4)

**Any Type of HPV**

|     |     |      |
|-----|-----|------|
| No  | 164 | 80.0 |
| Yes | 41  | 20.0 |

**High Risk HPV**

|     |     |      |
|-----|-----|------|
| No  | 183 | 89.3 |
| Yes | 22  | 10.7 |

**Only High Risk HPV**

|     |     |      |
|-----|-----|------|
| No  | 188 | 91.7 |
| Yes | 17  | 8.3  |

**Low Risk HPV**

|     |     |      |
|-----|-----|------|
| No  | 190 | 92.7 |
| Yes | 15  | 7.3  |

**Only Low Risk HPV**

|     |     |      |
|-----|-----|------|
| No  | 195 | 95.1 |
| Yes | 10  | 4.9  |

**Multiple HPV**

|     |     |      |
|-----|-----|------|
| No  | 194 | 94.6 |
| Yes | 11  | 5.4  |

**Table 2 - Oral HPV seroprevalence by individual genotypes among 205 men attending an STI clinic in PR**

| <b>HPV type</b>             | <b>n (N=205)</b> | <b>% (95% CI)</b>      |
|-----------------------------|------------------|------------------------|
| <b>Any HPV type</b>         | <b>41</b>        | <b>20 (14.8-26.1)</b>  |
| <b>High-Risk (HR)</b>       | <b>22</b>        | <b>10.7 (6.8-15.8)</b> |
| 16                          | 5                | 2.4                    |
| 31                          | 1                | 0.5                    |
| 35                          | 3                | 1.5                    |
| 39                          | 3                | 1.5                    |
| 51                          | 2                | 1.0                    |
| 52                          | 6                | 2.9                    |
| 56                          | 3                | 1.5                    |
| 58                          | 1                | 0.5                    |
| 66                          | 2                | 1.0                    |
| 68                          | 2                | 1.0                    |
| 73                          | 1                | 0.5                    |
| 74                          | 4                | 2.0                    |
| <b>Low-Risk (LR)</b>        | <b>15</b>        | <b>7.3 (4.2-11.8)</b>  |
| 6                           | 8                | 3.9                    |
| 11                          | 1                | 0.5                    |
| 43                          | 1                | 0.5                    |
| 44                          | 4                | 2.0                    |
| 54                          | 1                | 0.5                    |
| 70                          | 1                | 0.5                    |
| <b>Multiple<sup>†</sup></b> | <b>11</b>        | <b>5.4 (2.7-9.4)</b>   |

<sup>†</sup>Those that have two or more HPV types.

**Table 3 - Oral HPV prevalence and risk factors among 205 HIV+/HIV- men attending an STI clinic in PR**

| Characteristic                  | HPV negative | HPV positive | p-value |
|---------------------------------|--------------|--------------|---------|
|                                 | %(n)         | %(n)         |         |
| <b><u>Demographic</u></b>       |              |              |         |
| <b>Age at recruitment</b>       |              |              |         |
| 16-24                           | 88.6 (39)    | 11.4 (5)     | 0.002   |
| 25-34                           | 97.6 (40)    | 2.4 (1)      |         |
| 35-44                           | 73.2 (30)    | 26.8 (11)    |         |
| 45-54                           | 71.7 (33)    | 28.3 (13)    |         |
| 55+                             | 65.5 (19)    | 34.5 (10)    |         |
| <b>Level of education</b>       |              |              |         |
| < High School                   | 75.9 (41)    | 24.1 (13)    | 0.154   |
| High School                     | 75.9 (60)    | 24.1 (19)    |         |
| > High School                   | 87.3 (62)    | 12.7 (9)     |         |
| <b>Employed</b>                 |              |              |         |
| No                              | 79.1 (34)    | 20.9 (9)     | 0.134   |
| Yes                             | 82.7 (91)    | 17.3 (19)    |         |
| <b>Type of Health Insurance</b> |              |              |         |
| None                            | 83.8 (31)    | 16.2 (6)     | 0.751   |
| Public                          | 78.2 (93)    | 21.8 (26)    |         |
| Private                         | 80.4 (37)    | 19.6 (9)     |         |

| Characteristic                                         | HPV negative<br>%(n) | HPV positive<br>%(n) | p-value |
|--------------------------------------------------------|----------------------|----------------------|---------|
| <b><u>Behavioral</u></b>                               |                      |                      |         |
| <b>Ever smoked</b>                                     |                      |                      |         |
| No                                                     | 90.7 (49)            | 9.3 (5)              | 0.020   |
| Yes                                                    | 76.0 (114)           | 24.0 (36)            |         |
| <b>Current smoker</b>                                  |                      |                      |         |
| No                                                     | 73.2 (30)            | 26.8 (11)            | 0.514   |
| Yes                                                    | 78.5 (62)            | 21.5 (17)            |         |
| <b>Years Smoking</b>                                   |                      |                      |         |
| Mean (SD)                                              | 22.3 (14.5)          | 28.7 (12.5)          | 0.038   |
| <b>Ever had an alcoholic beverage</b>                  |                      |                      |         |
| No                                                     | 90.0 (9)             | 10.0 (1)             | 0.367   |
| Yes                                                    | 79.4 (154)           | 20.6 (40)            |         |
| <b>Ever smoked marihuana</b>                           |                      |                      |         |
| No                                                     | 87.0 (67)            | 13.0 (10)            | 0.048   |
| Yes                                                    | 75.6 (96)            | 24.4 (31)            |         |
| <b>Ever smoked marihuana in the past<br/>12 months</b> |                      |                      |         |
| No                                                     | 69.6 (48)            | 30.4 (21)            | 0.105   |
| Yes                                                    | 82.1 (46)            | 17.9 (10)            |         |



| <b>Characteristic</b>                                           | <b>HPV negative</b> | <b>HPV positive</b> | <b>p-value</b> |
|-----------------------------------------------------------------|---------------------|---------------------|----------------|
|                                                                 | <b>%(n)</b>         | <b>%(n)</b>         |                |
| <b><u>Sexual Activity</u></b>                                   |                     |                     |                |
| <b>Lifetime number of sexual partners</b>                       | 79.4 (158)          | 20.6 (41)           | 0.005          |
| Mean (SD)                                                       | 20.2 (28.9)         | 65.9 (98.2)         |                |
| <b>MSM</b>                                                      |                     |                     |                |
| No                                                              | 80.1 (109)          | 19.9 (27)           | 0.930          |
| Yes                                                             | 80.7 (46)           | 19.3 (11)           |                |
| <b>MSM who had oral sex at least once in their lifetime</b>     |                     |                     |                |
| No                                                              | 80.0 (4)            | 20.0 (1)            | 0.673          |
| Yes                                                             | 80.8 (42)           | 19.2 (10)           |                |
| <b>MSM who had oral sex at least once in the past 12 months</b> |                     |                     |                |
| No                                                              | 33.3 (1)            | 66.7 (2)            | 0.066          |
| Yes                                                             | 87.9 (29)           | 12.1 (4)            |                |
| <b>MSW</b>                                                      |                     |                     |                |
| No                                                              | 86.7 (26)           | 13.3 (4)            | 0.525          |
| Yes                                                             | 81.9 (131)          | 18.1 (29)           |                |
| <b>MSW who had oral sex at least once in their lifetime</b>     |                     |                     |                |
| No                                                              | 92.3 (12)           | 7.7 (1)             | 0.276          |
| Yes                                                             | 81.0 (119)          | 19.0 (28)           |                |

| <b>Characteristic</b>                     | <b>HPV negative</b> | <b>HPV positive</b> | <b>p-value</b> |
|-------------------------------------------|---------------------|---------------------|----------------|
|                                           | <b>%(n)</b>         | <b>%(n)</b>         |                |
| <b><u>Sexual Activity</u></b>             |                     |                     |                |
| <b>MSW who had oral sex at least once</b> |                     |                     |                |
| <b>in the past 12 months</b>              |                     |                     |                |
| No                                        | 79.3 (23)           | 20.7 (6)            | 0.688          |
| Yes                                       | 82.6 (76)           | 17.4 (16)           |                |
| <b><u>Clinical</u></b>                    |                     |                     |                |
| <b>HIV</b>                                |                     |                     |                |
| No                                        | 82.2 (83)           | 17.8 (18)           | 0.422          |
| Yes                                       | 77.7 (80)           | 22.3 (23)           |                |
| <b>Years living with HIV</b>              | 79.2 (80)           | 29.8 (21)           | 0.644          |
| Mean (SD)                                 | 11.3 (8.8)          | 12.2 (6.9)          |                |
